# Supplementary material for: Structure Based Docking and Molecular Dynamic Studies of Plasmodial Cysteine Proteases against a South African Natural Compound and its Analogs
Source: PubMed Central journal article supplement (PMC4814779; doi:10.1038/srep23690), 2016-03-31
Supplement: srep23690-s1.pdf [file srep23690-s1.pdf]

**Structure Based Docking and Molecular Dynamic Studies of *Plasmodial*  
Cysteine Proteases against a South African Natural Compound and its  
Analog**

Thommas M. Musyoka<sup>1</sup>, Aquillah M. Kanzi<sup>1,2</sup>, Kevin A. Lobb<sup>3</sup> & Özlem Tastan Bishop<sup>1\*</sup>

<sup>1</sup>Research Unit in Bioinformatics (RUBi), Department of Biochemistry and Microbiology,  
Rhodes University, Grahamstown, South Africa

<sup>2</sup>Department of Genetics, Forestry and Agricultural Biotechnology Institute (FABI), Faculty  
of Natural and Agricultural Sciences, University of Pretoria, Pretoria, South Africa

<sup>3</sup>Department of Chemistry, Rhodes University, Grahamstown, South Africa

Correspondence and requests for materials should be addressed to Ö.T.B. (email:

[O.TastanBishop@ru.ac.za](mailto:O.TastanBishop@ru.ac.za))

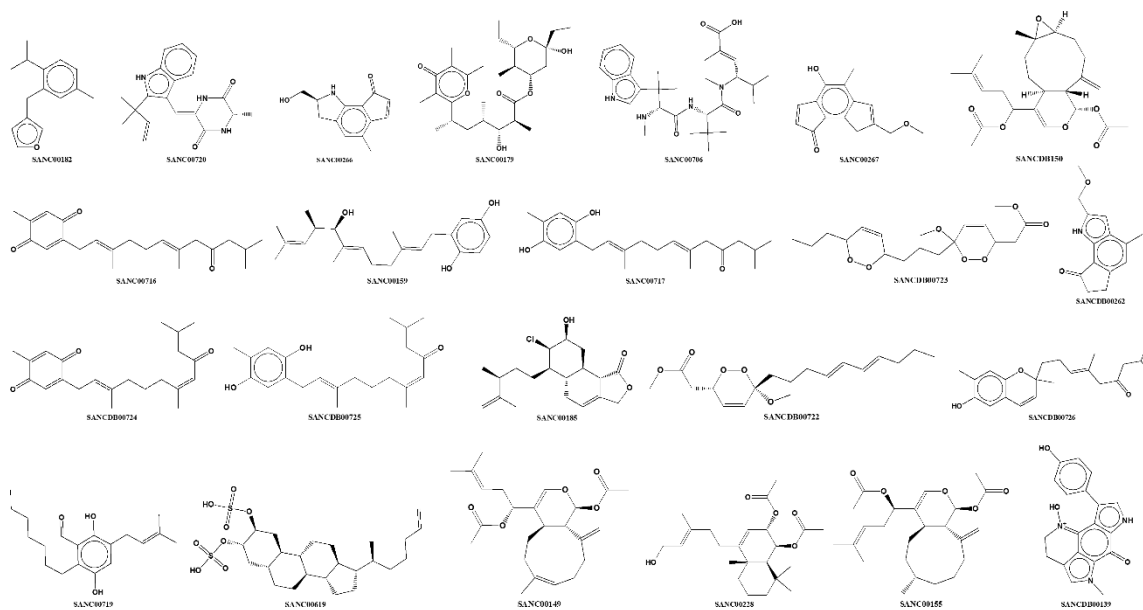

**Supplementary Figure S1.** 2D of South African non-peptidic compounds with SANCDDB identity numbers used for initial docking studies.

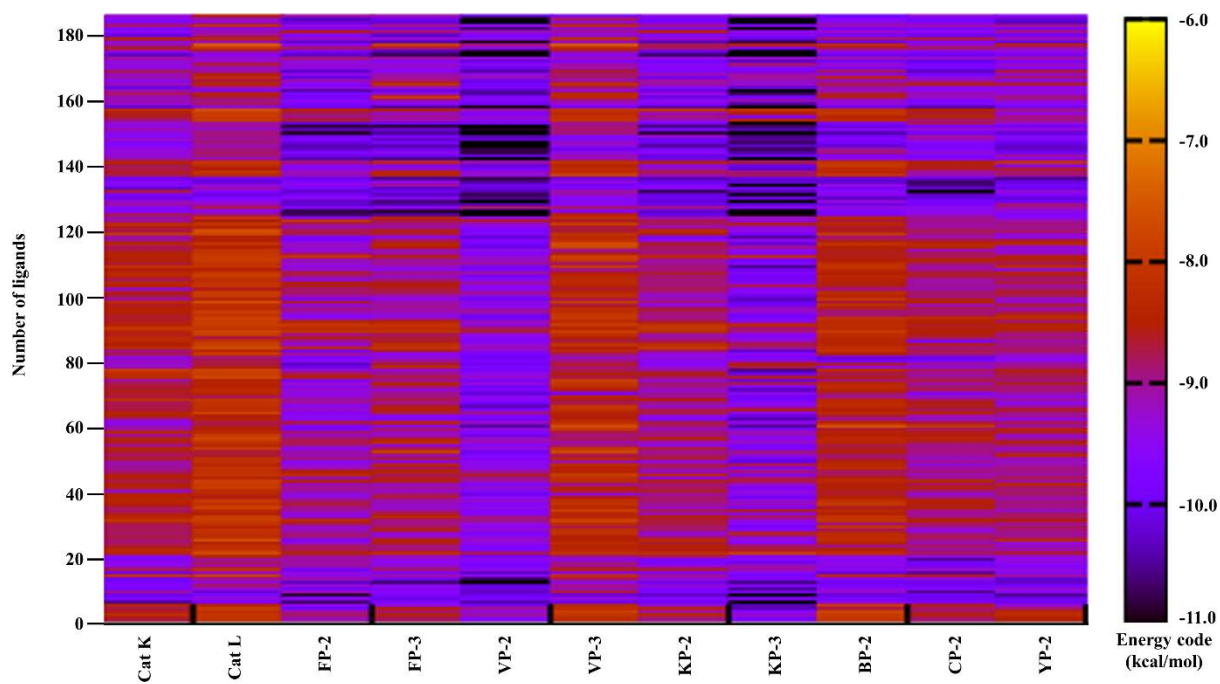

**Supplementary Figure S2.** Docking results on all proteases using AutoDock4.2 for all 186 ZINC hits obtained via 3D structure similarity search using 5PGA as the query template.

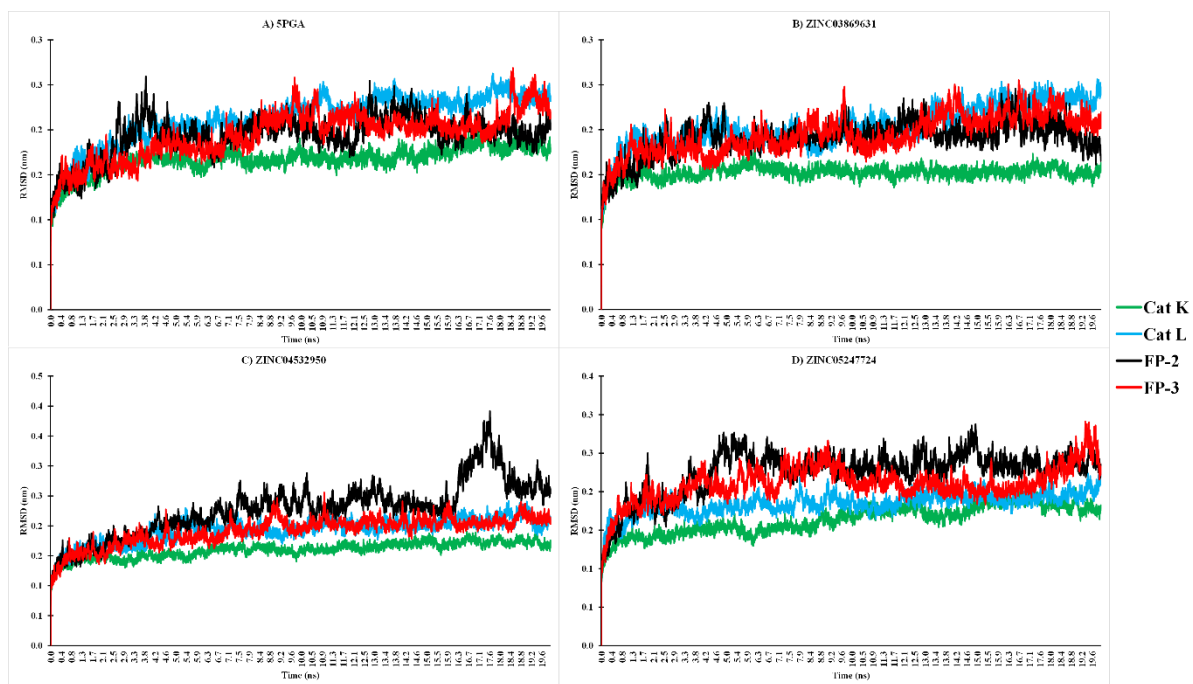

**Supplementary Figure S3:** RMSD plots of FP-2, FP-3 and Cat L in complex with **a)** 5PGA, **b)** ZINC03869631, **c)** ZINC04532950, and **d)** ZINC05247724.

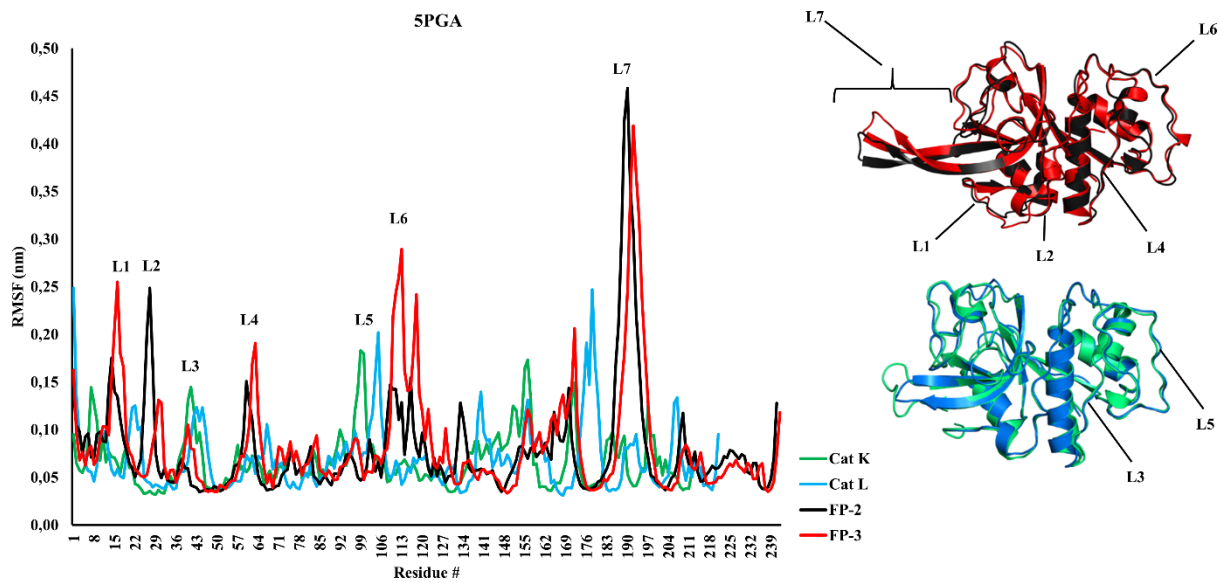

**Supplementary Figure S4:** RMSF plot of FP-2, FP-3 and Cat L in complex with 5PGA. The cartoon representation shows the different loop regions (LX) that exhibit highest fluctuations.

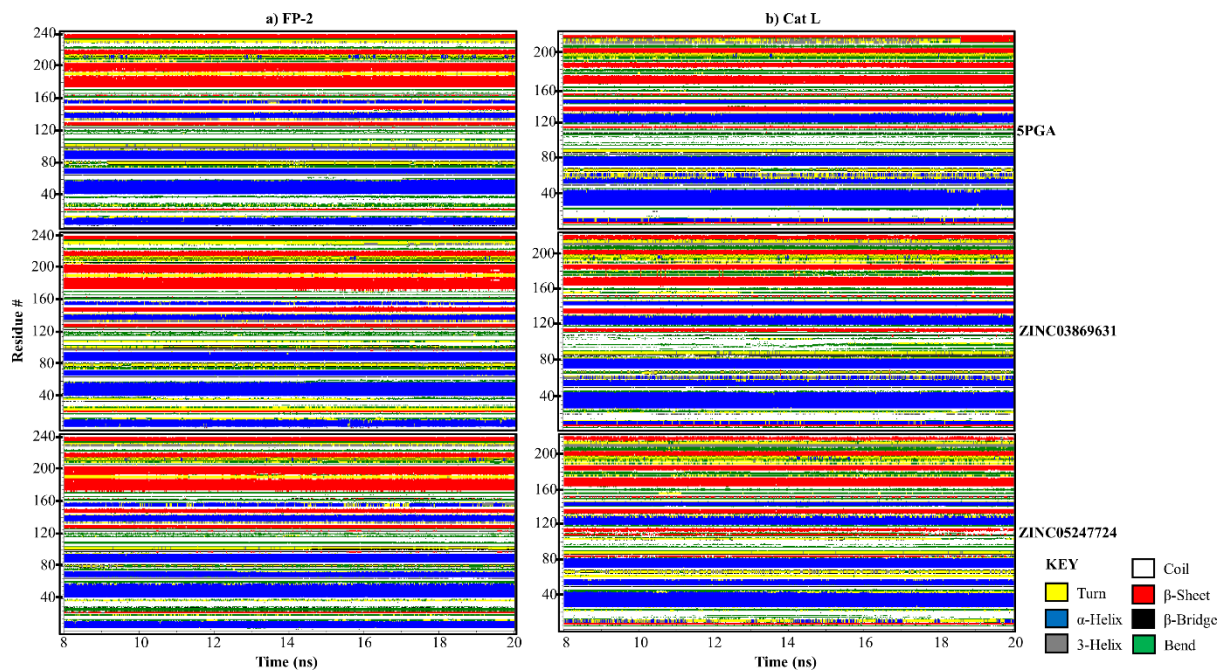

**Supplementary Figure S5.** Conformational evolution of secondary structure elements of a) FP-2 and b) Cat L in complex with 5PGA, ZINC03869631 and ZINC05247724 during the last 12 ns of MD simulation as determined by do\_dssp of GROMACS 4.6.5.
